# Supplementary material for: Syntheses and magnetic properties of a pyrimidyl-substituted nitronyl nitroxide radical and its cobalt(ii) complexes
Source: Royal Society of Chemistry journal article supplement (doi:10.1039/c6cc00915h), 2016-01-01
Supplement: c6cc00915h1.pdf [file c6cc00915h1.pdf]

Electronic Supplementary Material (ESI) for *Chem. Commun.*  
This journal is © The Royal Society of Chemistry 2016

## **Syntheses and Magnetic Properties of a Pyrimidyl-Substituted Nitronyl Nitroxide Radical and its Cobalt (II) Complexes**

**Jian Wang, Jia-Nan Li, Shao-Liang Zhang, Xin-hua Zhao, Dong Shao, Xin-Yi Wang\***

†State Key Laboratory of Coordination Chemistry, Collaborative Innovation Center of Advanced Microstructures, School of Chemistry and Chemical Engineering, Nanjing University, Nanjing, 210093, China. \*Email: [wangxy66@nju.edu.cn](mailto:wangxy66@nju.edu.cn)

Supporting Information

## Table of contents:

|                                                                                                     |    |
|-----------------------------------------------------------------------------------------------------|----|
| 1. Physical Measurements.....                                                                       | 4  |
| 2. Synthesis.....                                                                                   | 4  |
| 3. EPR spectrum for <b>1</b> .....                                                                  | 5  |
| <b>Figure S1</b> EPR spectrum of the radical ligand <b>1</b> .....                                  | 6  |
| 4. X-ray crystallography.....                                                                       | 6  |
| <b>Table S1</b> Crystallographic Data and Structure Refinement Parameters for <b>1-3</b> .....      | 7  |
| <b>Table S2-S4</b> Selected Bond Lengths (Å) in <b>1-3</b> .....                                    | 8  |
| <b>Figure S2</b> The asymmetric unit of compound <b>1</b> .....                                     | 9  |
| <b>Figure S3</b> The shortest O...O distance in <b>1</b> .....                                      | 9  |
| <b>Figure S4</b> The asymmetric unit of compound <b>2</b> .....                                     | 10 |
| <b>Figure S5</b> The asymmetric unit of compound <b>3</b> .....                                     | 10 |
| 5. Powder X-ray diffraction (PXRD) spectra of <b>1-3</b> .....                                      | 11 |
| <b>Figure S6</b> Powder X-ray diffraction pattern of the radical ligand <b>1</b> .....              | 11 |
| <b>Figure S7</b> Powder X-ray diffraction pattern of compound <b>2</b> .....                        | 11 |
| <b>Figure S8</b> Powder X-ray diffraction pattern of compound <b>3</b> .....                        | 12 |
| 6. Magnetic measurements.....                                                                       | 12 |
| <b>Figure S9</b> The field dependent magnetization curve of <b>1</b> .....                          | 12 |
| <b>Figure S10</b> The field dependent magnetization curve of <b>2</b> .....                         | 13 |
| <b>Figure S11</b> The field dependent magnetization curve of <b>3</b> .....                         | 13 |
| <b>Figure S12</b> Reduced magnetization data of <b>2</b> .....                                      | 14 |
| <b>Figure S13</b> Reduced magnetization data of <b>3</b> .....                                      | 14 |
| <b>Figure S14</b> Temperature dependent a.c. susceptibility data of <b>2</b> at zero dc field.....  | 15 |
| <b>Figure S15</b> Temperature dependent a.c. susceptibility data of <b>2</b> at 1 kOe dc field..... | 16 |
| <b>Figure S16</b> Temperature dependent a.c. susceptibility data of <b>3</b> at zero dc field.....  | 17 |
| <b>Table S5</b> Relaxation fitting parameters of the Cole-Cole plots of <b>3</b> .....              | 17 |

**7. References .....18**

## 1. Physical Measurements

IR data were measured on KBr pellets using a Bruker Vector 22 FT-IR spectrometer in the 4000-400  $\text{cm}^{-1}$  range. Elemental analyses for C, H, and N were performed at Elementar Vario MICRO analyzer. Magnetic susceptibility measurements were performed using a Quantum Design SQUID VSM magnetometer on micro crystalline samples for all compounds. Direct current (dc) measurements were conducted from 300 to 2 K under an external magnetic field of 1000 Oe. The field dependences of the magnetization were measured at 2 K with dc magnetic field between 0 and 7 T. All magnetic data were corrected for the sample holder, the eicosane and for the diamagnetic contribution of the sample.

## 2. Synthesis

All preparations and manipulations were performed under aerobic conditions. All starting material and solvents were obtained from commercial sources and used as received. The solvents were commercially purchased and used as received. The starting material  $\text{Co}(\text{hfac})_2 \cdot 2\text{H}_2\text{O}$  (hfac = 1,1,1,5,5,5-hexafluoroacetylacetonato) were used as purchased from Sigma-Aldrich. The pyrimidine-2-carbaldehyde was synthesized following a published method.<sup>S1</sup>

**NIT-2-Pm (1).** This new radical was synthesized by the reported method using pyrimidine-2-carbaldehyde as the starting aldehyde.<sup>S2</sup> Yield: 45%. Color: purple. Anal. Calcd (%) for  $\text{C}_{11}\text{H}_{15}\text{N}_4\text{O}_2$ : C, 56.16; H, 6.43; N, 23.81. Found: C

56.21; H, 6.26; N, 23.72. IR (KBr pellet,  $\text{cm}^{-1}$ ): 3140(m), 23141(m), 1638(s), 1448(s), 1222(s), 1261(s), 1186(s), 826(m), 635(m), 584(m).

**(NIT-2-Pm)Co(hfac)<sub>2</sub> (2)**. A solution of  $\text{Co}(\text{hfac})_2 \cdot 2\text{H}_2\text{O}$  (51.1 mg, 0.1 mmol, 1.0 eq) in 25 mL of dry boiling n-heptane was heated to reflux for 4 h and then cooled to 80 °C. Then 10 mL of  $\text{CHCl}_3$  solution of NIT-2-Pm (23.5 mg, 0.1 mmol, 1.0 eq) was added with stirred for 30 min. The final solution was cooled to room temperature and filtered. After 3 days, black crystals of **2**, suitable for X-ray diffraction, were obtained. Yield: 21.4 mg (30%). Anal. Calcd (%) for  $\text{CoC}_{21}\text{H}_{15}\text{N}_4\text{O}_6\text{F}_6$ : C, 42.58; H, 2.55; N, 9.46. Found: C, 42.45; H, 2.51; N, 9.49. IR (KBr pellet,  $\text{cm}^{-1}$ ): 3136(m), 2345(m), 1676(s), 1457(s), 1234(s), 1207(s), 1150(s), 823(m), 644(m), 596(m).

**( $\mu$ -NIT-2-Pm)Co<sub>2</sub>(hfac)<sub>4</sub> (3)**. Complex **3** was synthesized in a way similar to that of complex **2**. When the equivalence ratio of  $\text{Co}(\text{hfac})_2 \cdot 2\text{H}_2\text{O}$  and NIT-2-Pm was changed from 1:1 to 1:2, complex **3** was obtained. Yield: 22.8 mg (38%). Anal. Calcd (%) for  $\text{Co}_2\text{C}_{31}\text{H}_{15}\text{N}_4\text{O}_{10}\text{F}_{12}$ : C, 39.22; H, 1.59; N, 5.90. Found: C, 39.18; H, 1.62; N, 5.88. IR (KBr pellet,  $\text{cm}^{-1}$ ): 3124(m), 2347(m), 1658(s), 1498(s), 1267(s), 1213(s), 1142(s), 801(m), 660(m), 584(m).

### 3. EPR Spectrum for **1**

The EPR spectrum of compound **1** at 300 K in  $\text{CH}_2\text{Cl}_2$  solution shows five similar major lines in the ratio of 1:2:3:2:1, as expected for coupling with two identical nitrogen atoms of N-O groups in the radicals. The *g* value is estimated as 2.01, and the nitrogen hyperfine coupling constants  $\alpha^{\text{N}}$  is 7.34 G.

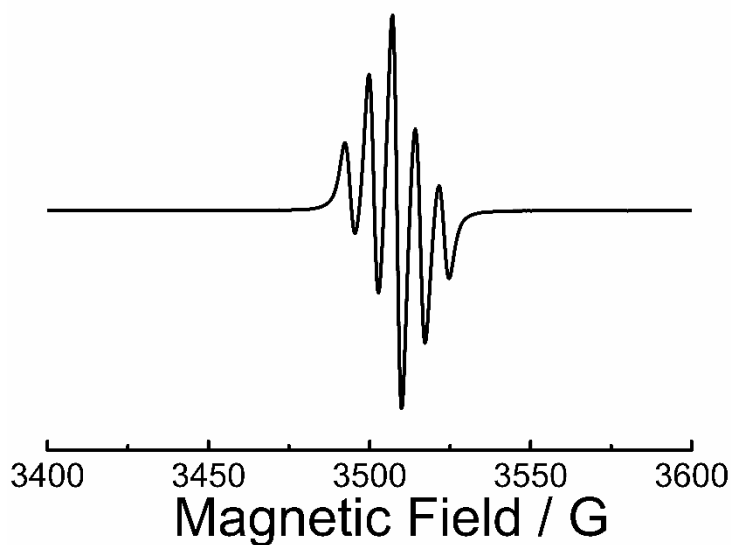

Fig. S1 EPR spectrum of the radical ligand **1**.

#### 4. X-ray crystallography

Single crystal x-ray crystallographic data were collected on a Bruker APEX II or APEX Duo diffractometer with a CCD area detector (Mo-K $\alpha$  radiation,  $\lambda = 0.71073$  Å). The APEX<sup>II</sup> program was used to determine the unit cell parameters and for data collection. The data were integrated and corrected for Lorentz and polarization effects using SAINT.<sup>S3</sup> Absorption corrections were applied with SADABS.<sup>S4</sup> The structures were solved by direct method and refined by full-matrix least-squares method on  $F^2$  using the SHELXTL crystallographic software package.<sup>S5</sup> All the non-hydrogen atoms were refined anisotropically. Hydrogen atoms of the organic ligands were refined as riding on the corresponding non-hydrogen atoms. Additional details of the data collections and structural refinement parameters are provided in Table 1. Selected bond lengths of **1-3** are listed in Table 2-4. CCDC-1449528 (**1**), CCDC-1449529 (**2**) and CCDC-1449530 (**3**) contain the supplementary crystallographic data for this

paper. These data can be obtained free of charge from The Cambridge Crystallographic Data Centre via [www.ccdc.cam.ac.uk/data\\_request/cif](http://www.ccdc.cam.ac.uk/data_request/cif).

**Table S1.** Crystallographic Data and Structure Refinement Parameters for **1-3**

| complex                                                                                               | <b>1</b>                                                      | <b>2</b>                                                                        | <b>3</b>                                                                                       |
|-------------------------------------------------------------------------------------------------------|---------------------------------------------------------------|---------------------------------------------------------------------------------|------------------------------------------------------------------------------------------------|
| Formula                                                                                               | C <sub>11</sub> H <sub>15</sub> N <sub>4</sub> O <sub>2</sub> | CoC <sub>21</sub> H <sub>19</sub> N <sub>4</sub> O <sub>6</sub> F <sub>12</sub> | Co <sub>2</sub> C <sub>31</sub> H <sub>23</sub> N <sub>4</sub> O <sub>10</sub> F <sub>24</sub> |
| Mr (g mol <sup>-1</sup> )                                                                             | 235.27                                                        | 710.33                                                                          | 1185.39                                                                                        |
| Crystal size(mm <sup>3</sup> )                                                                        | 0.45×0.41×0.27                                                | 0.33×0.20×0.12                                                                  | 0.35×0.21×0.18                                                                                 |
| Crystal system                                                                                        | monoclinic                                                    | triclinic                                                                       | monoclinic                                                                                     |
| Space group                                                                                           | <i>P</i> 2 <sub>1</sub> / <i>c</i>                            | <i>P</i> $\bar{1}$                                                              | <i>P</i> 2 <sub>1</sub> / <i>n</i>                                                             |
| <i>a</i> (Å)                                                                                          | 6.211(3)                                                      | 14.967(3)                                                                       | 12.6019(7)                                                                                     |
| <i>b</i> (Å)                                                                                          | 40.769(17)                                                    | 15.106(3)                                                                       | 20.7451(12)                                                                                    |
| <i>c</i> (Å)                                                                                          | 9.646(4)                                                      | 15.938(3)                                                                       | 17.6713(11)                                                                                    |
| $\alpha$ (°)                                                                                          | 90.000                                                        | 69.812(2)                                                                       | 90.000                                                                                         |
| $\beta$ (°)                                                                                           | 96.104(7)                                                     | 62.763(2)                                                                       | 104.6650(10)                                                                                   |
| $\gamma$ (°)                                                                                          | 90.000                                                        | 66.380(2)                                                                       | 90.000                                                                                         |
| <i>V</i> (Å <sup>3</sup> )                                                                            | 2428.6(18)                                                    | 2877.0(9)                                                                       | 4469.3(5)                                                                                      |
| <i>Z</i>                                                                                              | 8                                                             | 4                                                                               | 4                                                                                              |
| <i>T</i> , K                                                                                          | 296(2)                                                        | 296(2)                                                                          | 296(2)                                                                                         |
| $\rho_{\text{calcd}}$ (g cm <sup>-3</sup> )                                                           | 1.287                                                         | 1.640                                                                           | 1.762                                                                                          |
| $\mu(\text{Mo-K}\alpha)$ (mm <sup>-1</sup> )                                                          | 0.092                                                         | 0.717                                                                           | 0.898                                                                                          |
| <i>F</i> (000)                                                                                        | 1000                                                          | 1424                                                                            | 2348                                                                                           |
| $\theta$ range (°)                                                                                    | 2.00 – 27.84                                                  | 2.30 – 26.37                                                                    | 1.54 – 27.54                                                                                   |
| Refl.collected/unique                                                                                 | 16524 / 5746                                                  | 16946 / 11587                                                                   | 30366 / 10295                                                                                  |
| R(int)                                                                                                | 0.0787                                                        | 0.0283                                                                          | 0.0227                                                                                         |
| <i>T</i> <sub>max</sub> / <i>T</i> <sub>min</sub>                                                     | 0.9756 / 0.9598                                               | 0.8699 / 0.7979                                                                 | 0.8551 / 0.8134                                                                                |
| <i>R</i> <sub>1</sub> <sup>a</sup> / <i>wR</i> <sub>2</sub> <sup>b</sup> ( <i>I</i> > 2σ( <i>I</i> )) | 0.0703 / 0.1373                                               | 0.0753 / 0.2321                                                                 | 0.0666 / 0.2103                                                                                |

|                                  |                 |                 |                 |
|----------------------------------|-----------------|-----------------|-----------------|
| $R_1/wR_2$ (all data)            | 0.1748 / 0.1695 | 0.1043 / 0.2627 | 0.0855 / 0.2296 |
| GOF on $F^2$                     | 1.008           | 1.057           | 1.069           |
| Max/min ( $e \text{ \AA}^{-3}$ ) | 0.168 / -0.232  | 2.465 / -0.732  | 1.444 / -0.771  |

$$^a R_1 = \frac{\sum ||F_o| - |F_c||}{\sum |F_o|}, \quad ^b wR_2 = \left\{ \frac{\sum [w(F_o^2 - F_c^2)^2]}{\sum [w(F_o^2)^2]} \right\}^{1/2}$$

**Table S2** Selected bond lengths ( $\text{\AA}$ ) for **1**.

|       |          |       |          |
|-------|----------|-------|----------|
| O1-N1 | 1.279(3) | O2-N2 | 1.281(3) |
| O3-N7 | 1.278(3) | O4-N8 | 1.282(3) |

**Table S3** Selected bond lengths ( $\text{\AA}$ ) for **2**.

|        |          |         |          |
|--------|----------|---------|----------|
| O1-N4  | 1.267(7) | O2-N3   | 1.289(6) |
| O7-N8  | 1.271(9) | O8-N7   | 1.288(6) |
| Co1-O2 | 2.043(4) | Co2-O8  | 2.033(4) |
| Co1-O3 | 2.056(5) | Co2-O9  | 2.056(3) |
| Co1-O4 | 2.042(3) | Co2-O10 | 2.037(4) |
| Co1-O5 | 2.053(3) | Co2-O11 | 2.060(5) |
| Co1-O6 | 2.044(4) | Co2-O12 | 2.067(4) |
| Co1-N1 | 2.169(5) | Co2-N5  | 2.151(5) |

**Table S4** Selected bond lengths ( $\text{\AA}$ ) for **3**.

|          |          |         |          |
|----------|----------|---------|----------|
| O1-N1    | 1.283(5) | O2-N2   | 1.274(5) |
| Co1-O1   | 2.075(3) | Co1-O3  | 2.049(3) |
| Co1-O4   | 2.034(3) | Co1-O5  | 2.034(3) |
| Co1-O6   | 2.032(3) | Co1-N1  | 2.152(3) |
| Co2-O2   | 2.048(3) | Co 2-O7 | 2.039(3) |
| Co 2-O8  | 2.046(3) | Co 2-O9 | 2.030(3) |
| Co 2-O10 | 2.061(4) | Co 2-N2 | 2.178(3) |



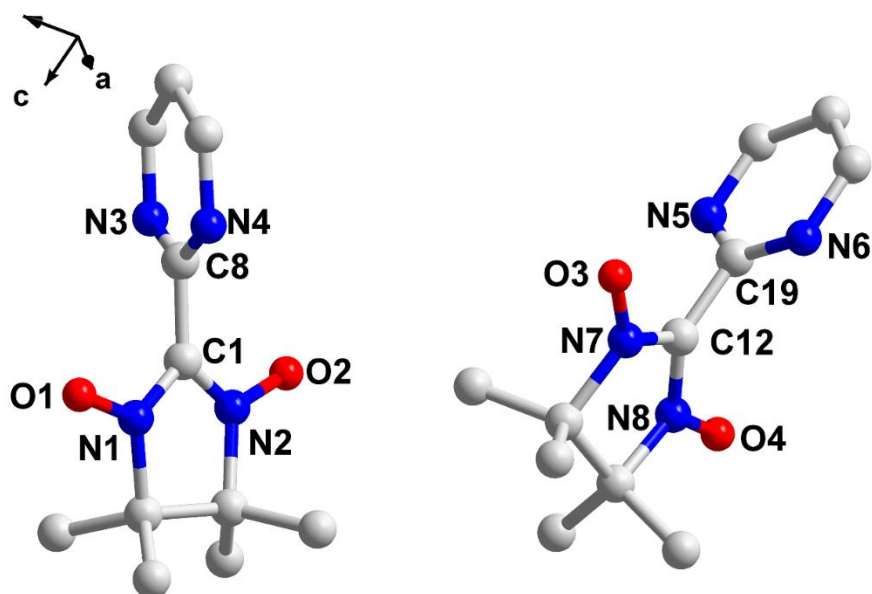

**Fig. S2** The asymmetric unit of compound **1**. Atoms: carbon (gray), nitrogen (blue) and oxygen (red). All hydrogen atoms were omitted for clarity.

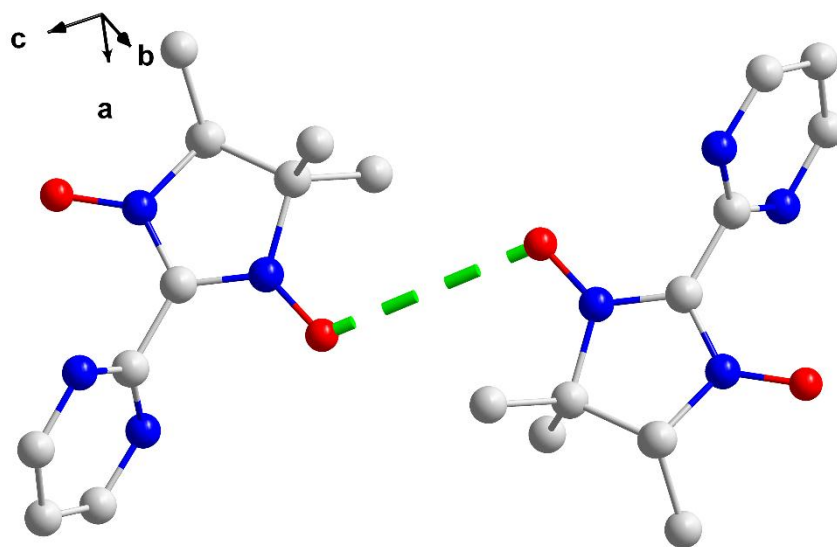

**Fig. S3** The shortest O...O distance in **1**. Atoms: carbon (gray), nitrogen (blue) and oxygen (red). All hydrogen and fluorine atoms are omitted for clarity.

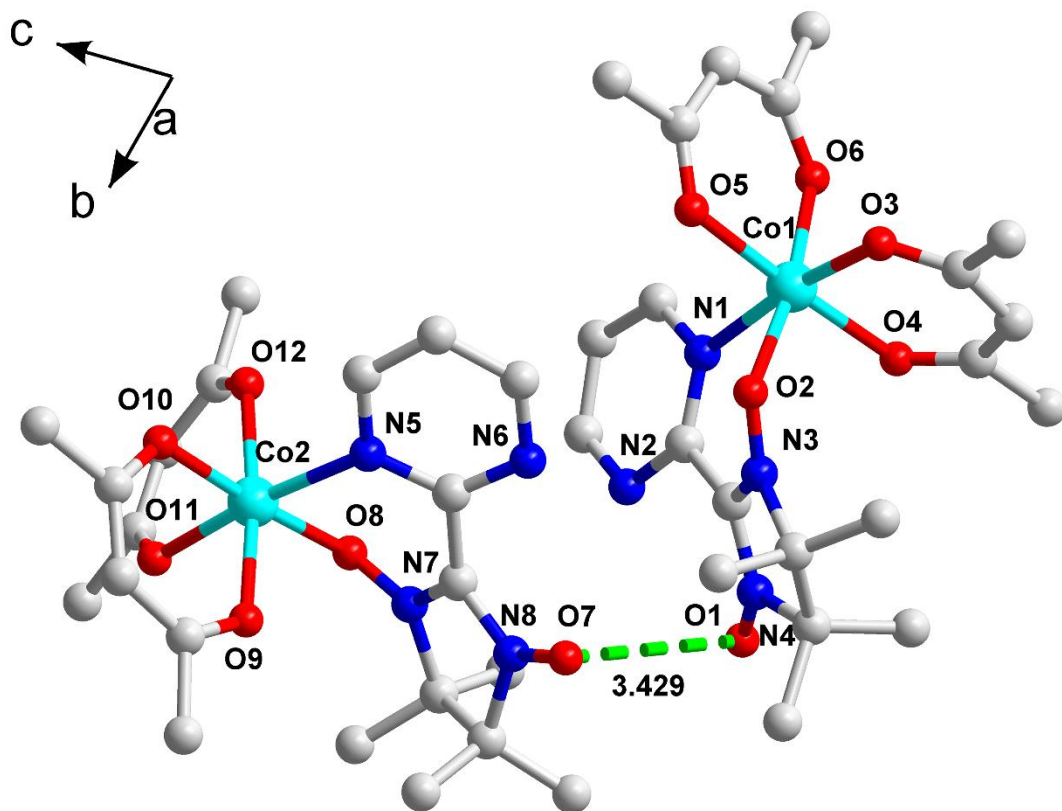

**Fig. S4** Crystal structure of compound 2. Atoms: carbon (gray), nitrogen (blue) oxygen (red) and cobalt (II) (cyan). All hydrogen and fluorine atoms are omitted for clarity.

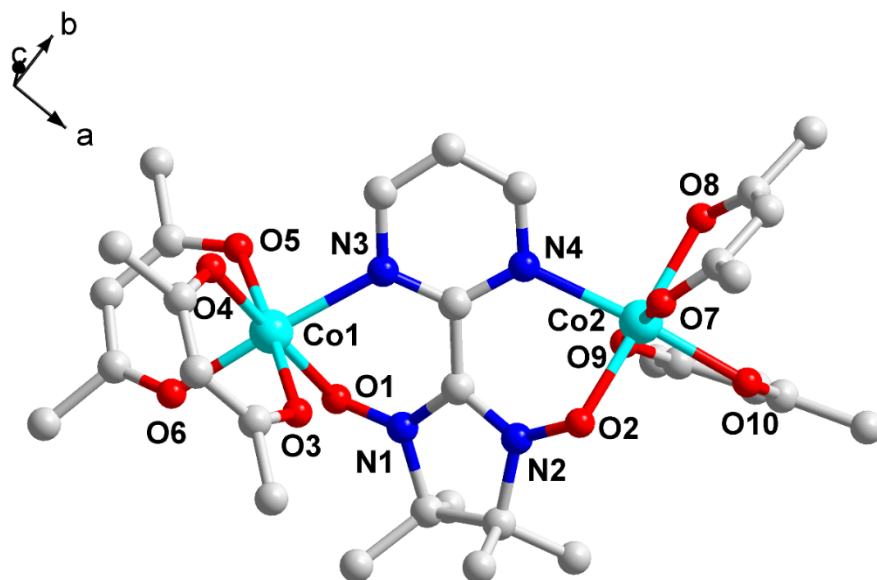

**Fig. S5** The asymmetric unit of compound 3. Atoms: carbon (gray), nitrogen (blue) oxygen (red) and cobalt (II) (cyan). All hydrogen and fluorine atoms are omitted for clarity.

## 5. Powder X-ray diffraction (PXRD) spectra of 1, 2 and 3

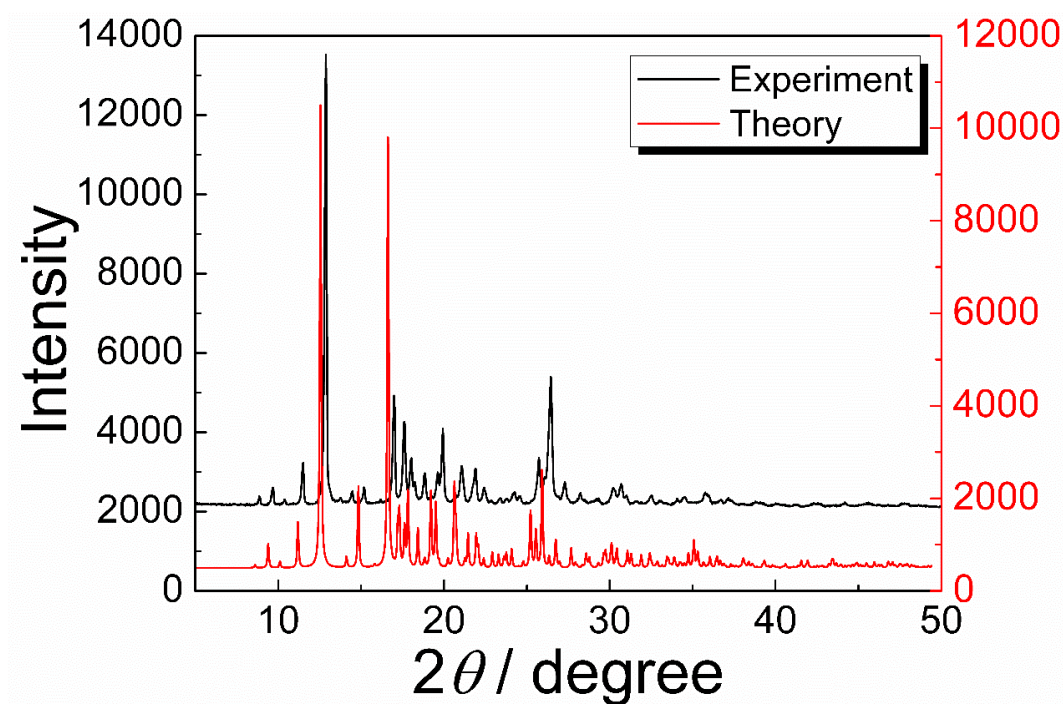

**Fig. S6** Powder X-ray diffraction pattern of radical ligand **1** at room temperature, together with the calculated pattern from the single crystal data.

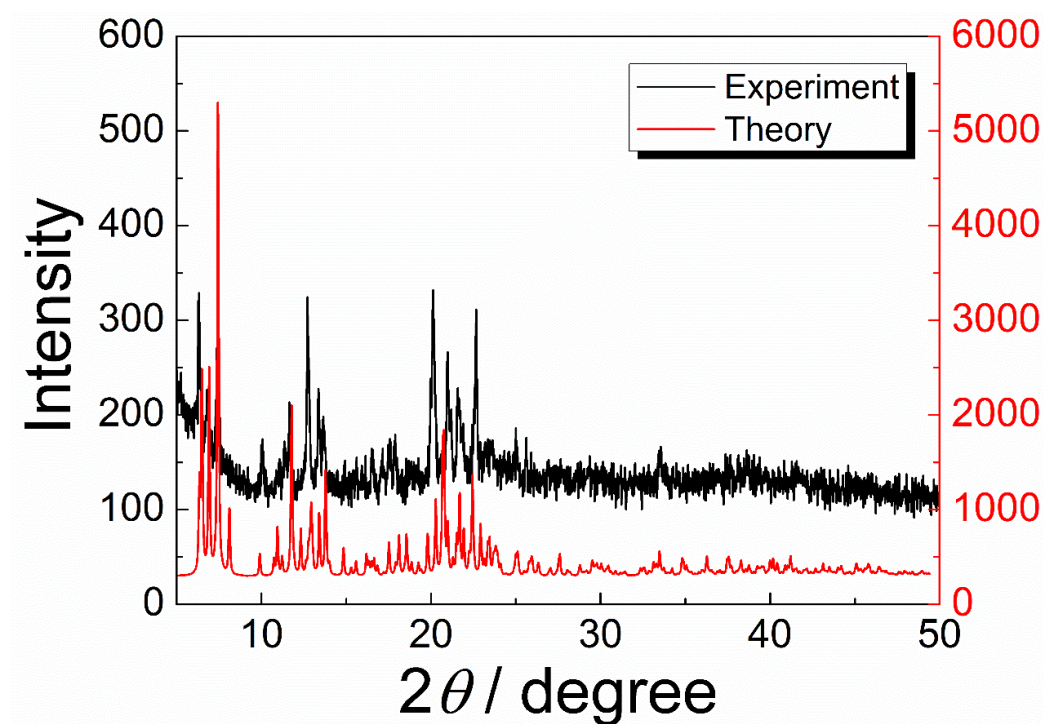

**Fig. S7** Powder X-ray diffraction pattern of compound **2** at room temperature, together with the calculated pattern from the single crystal data.

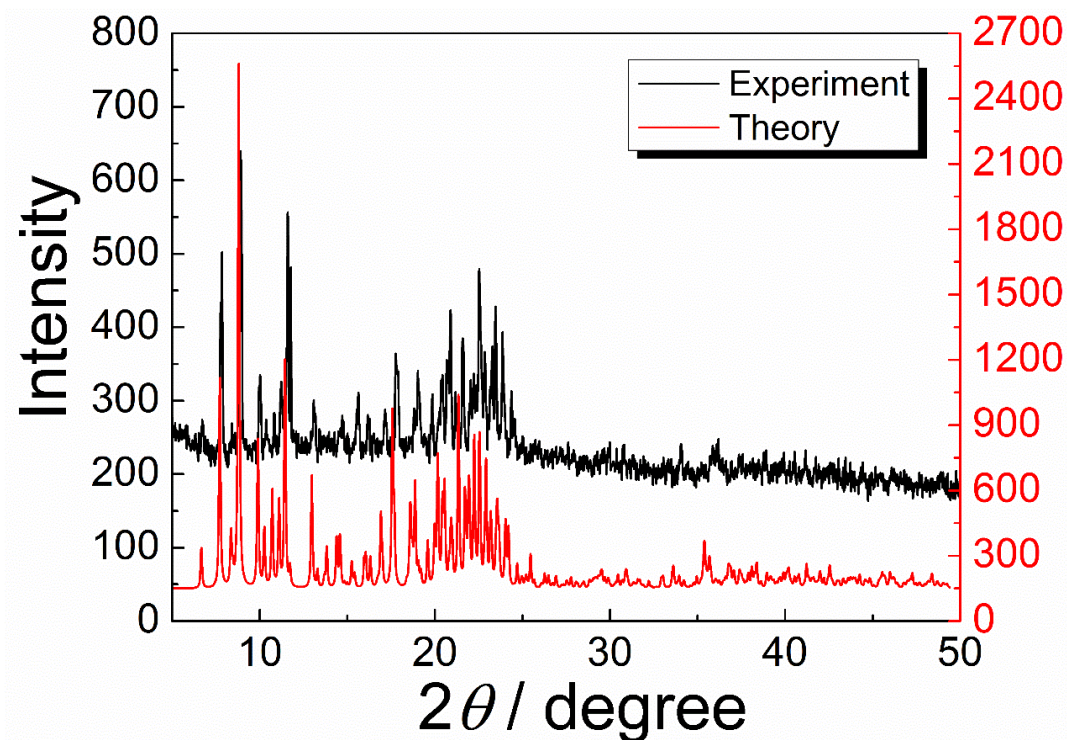

**Fig. S8** Powder X-ray diffraction pattern of compound **3** at room temperature, together with the calculated pattern from the single crystal data.

## 6. Magnetic measurements

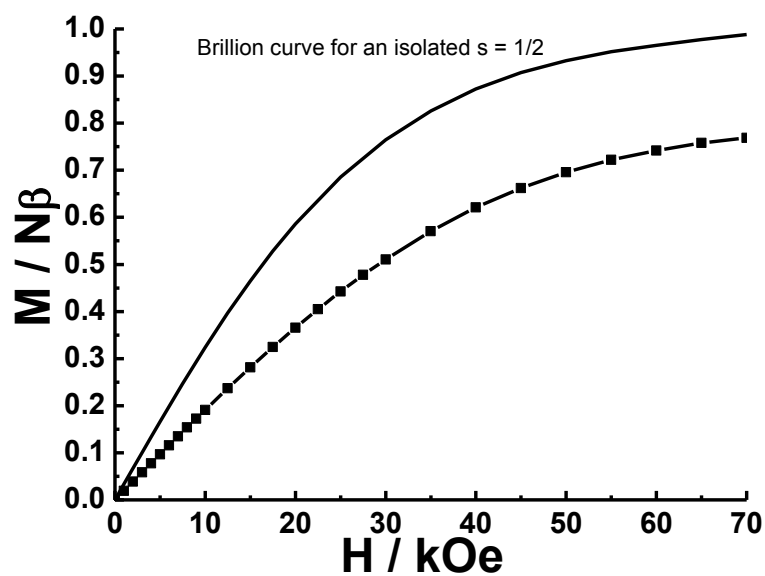

**Fig. S9** The field dependent magnetization curve of **1** at 2 K. The solid line represents the calculated Brillouin curve for an isolated  $s = 1/2$ .

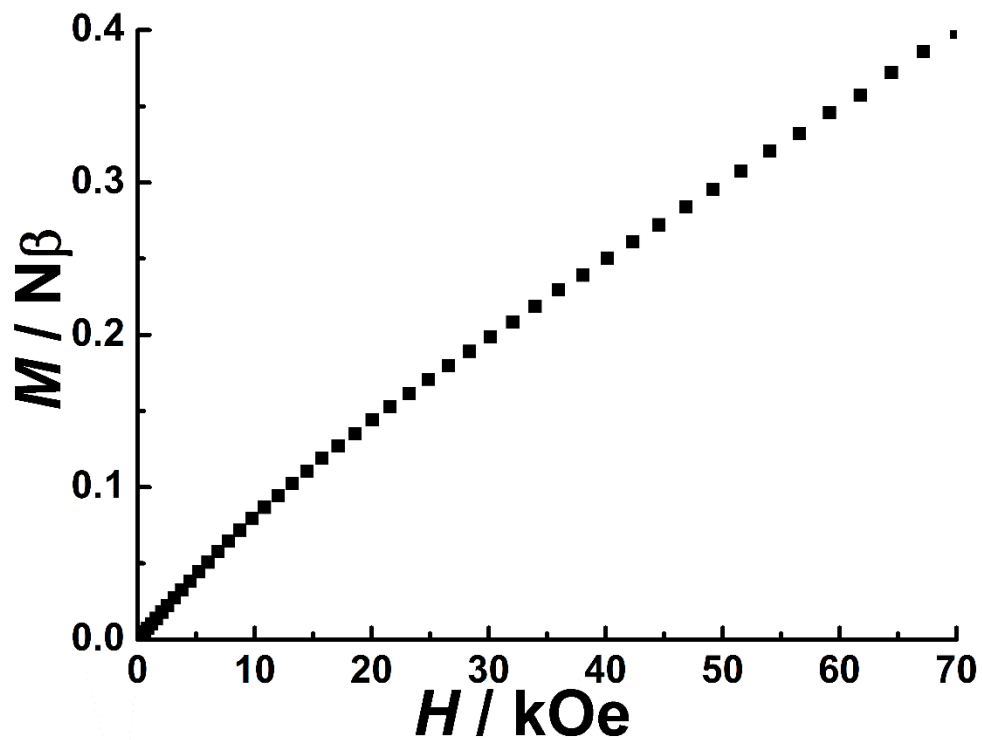

Fig. S10 The field dependent magnetization curve of 2 at 2 K.

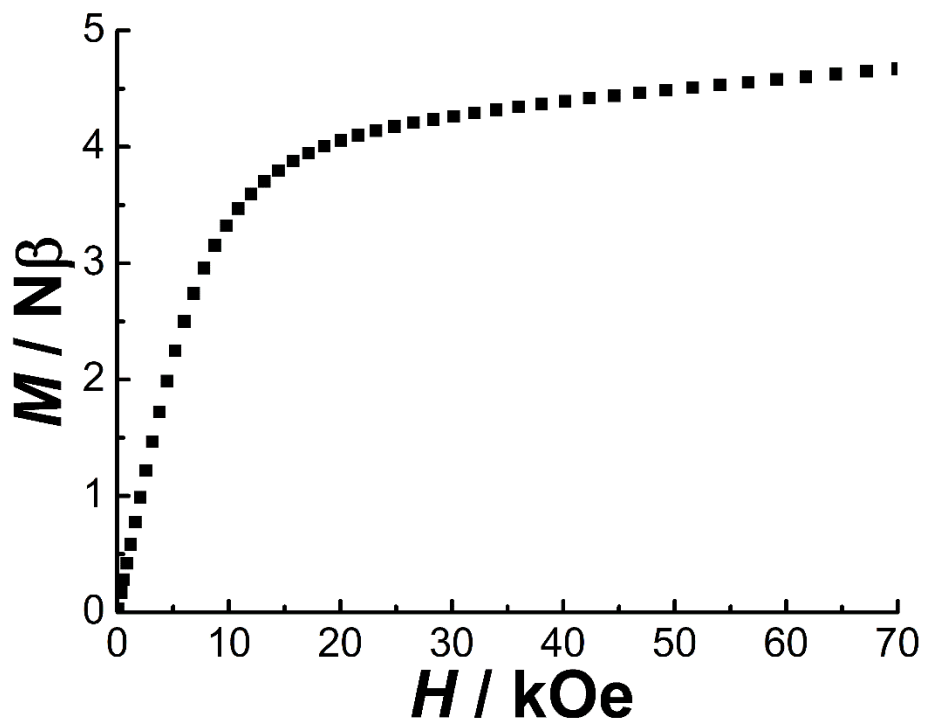

Fig. S11 The field dependent magnetization curve of 3 at 2 K.

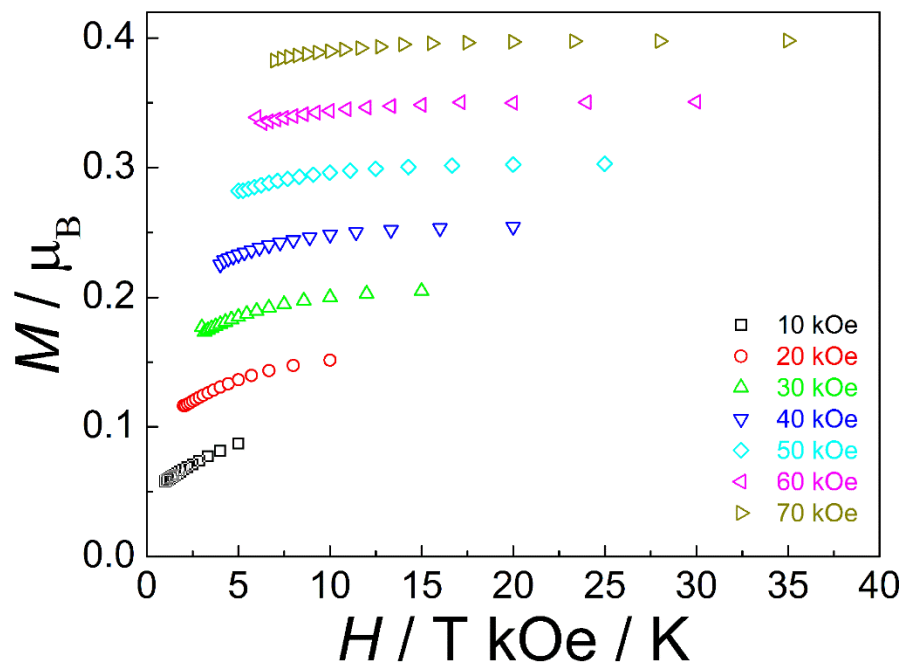

Fig. S12 The reduced magnetization data of **2** collected under various applied dc fields.

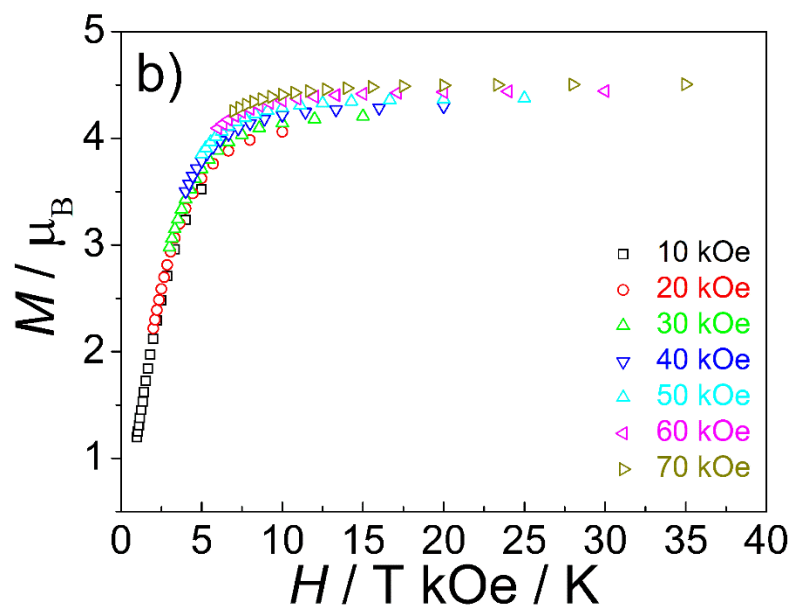

Fig. S13 The reduced magnetization data of **3** collected under various applied DC fields.



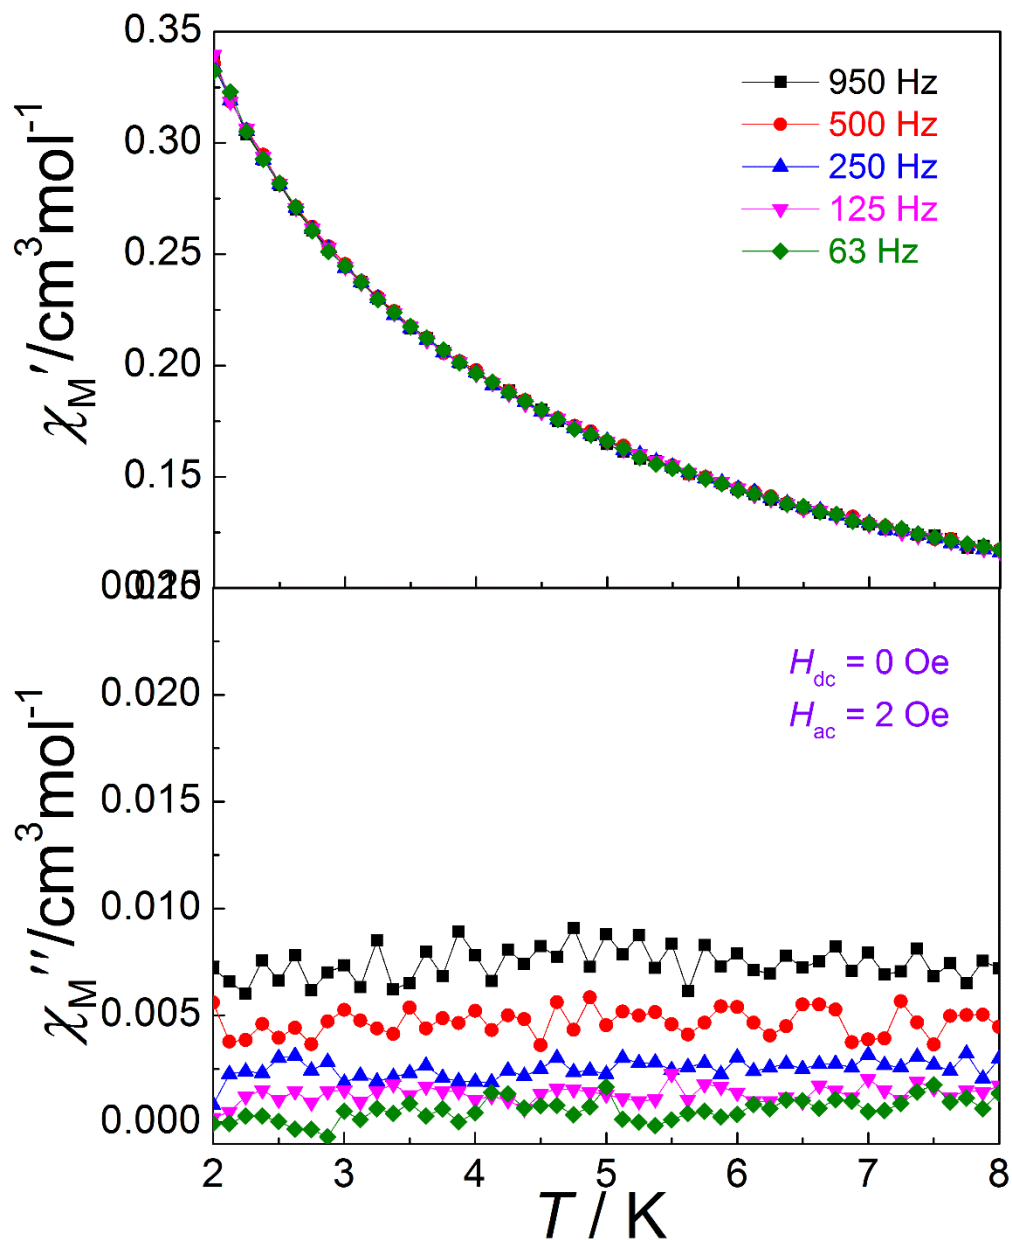

**Fig. S14** Temperature dependent in-phase (top) and out-of-phase (bottom) a.c. susceptibility data

of **2** measured under 0 Oe dc field ( $H_{ac} = 2$  Oe). No out-of-phase signals were observed.

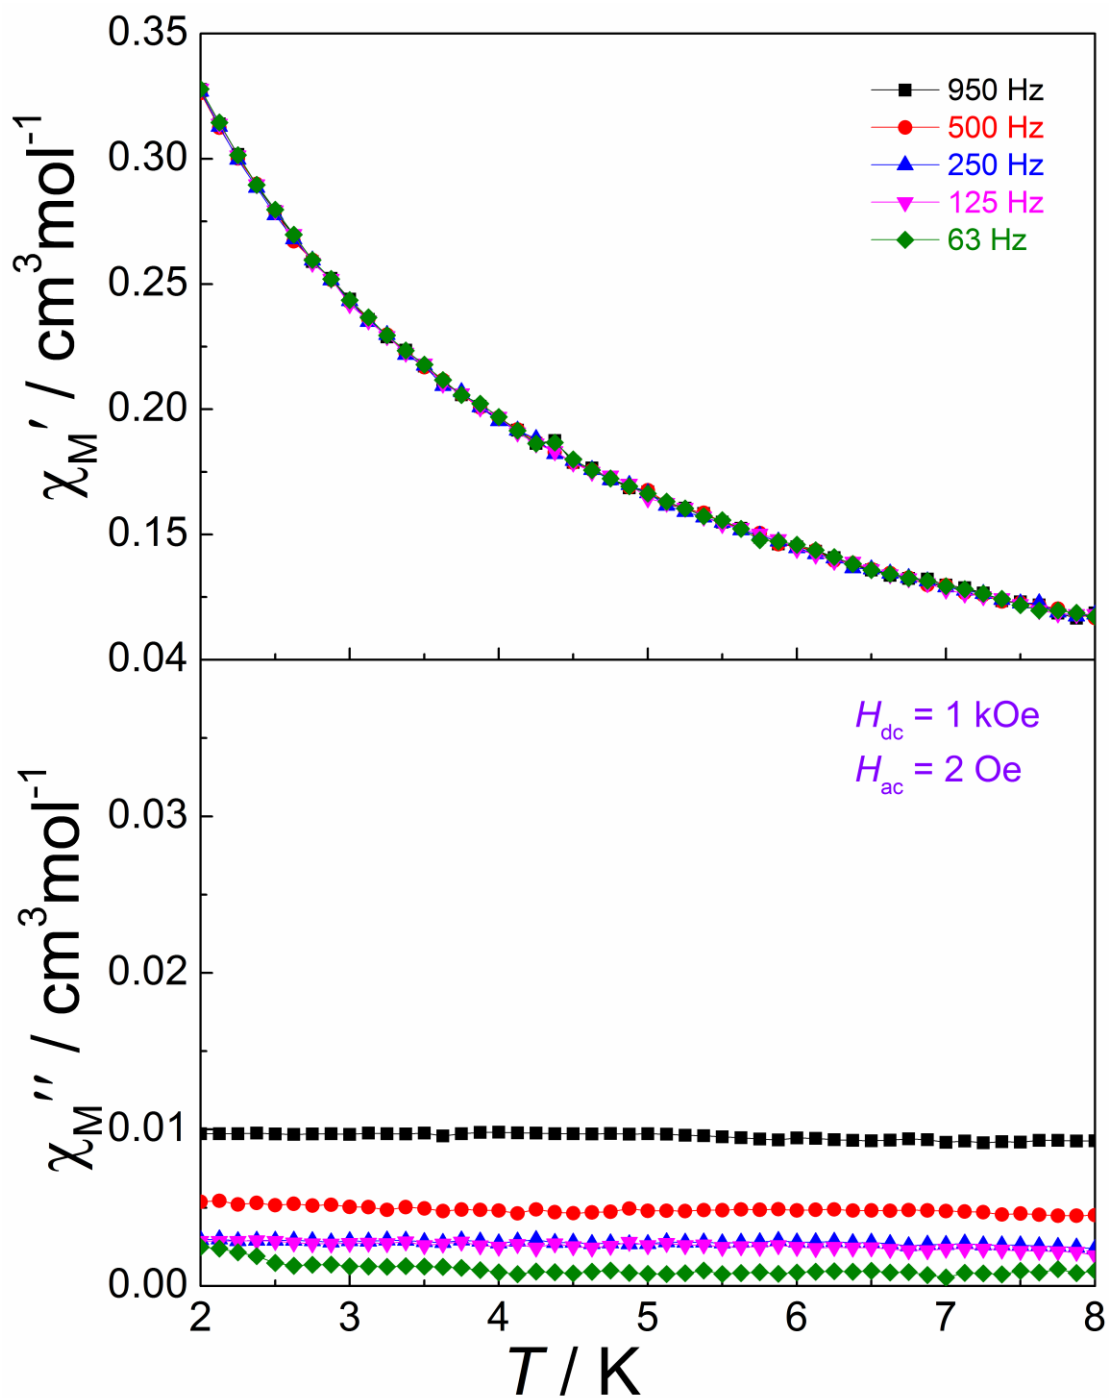

**Fig. S15** Temperature dependent in-phase (top) and out-of-phase (bottom) a.c. susceptibility data

of **2** measured under 1 kOe dc field ( $H_{\text{ac}} = 2 \text{ Oe}$ ). No out-of-phase signals were observed.



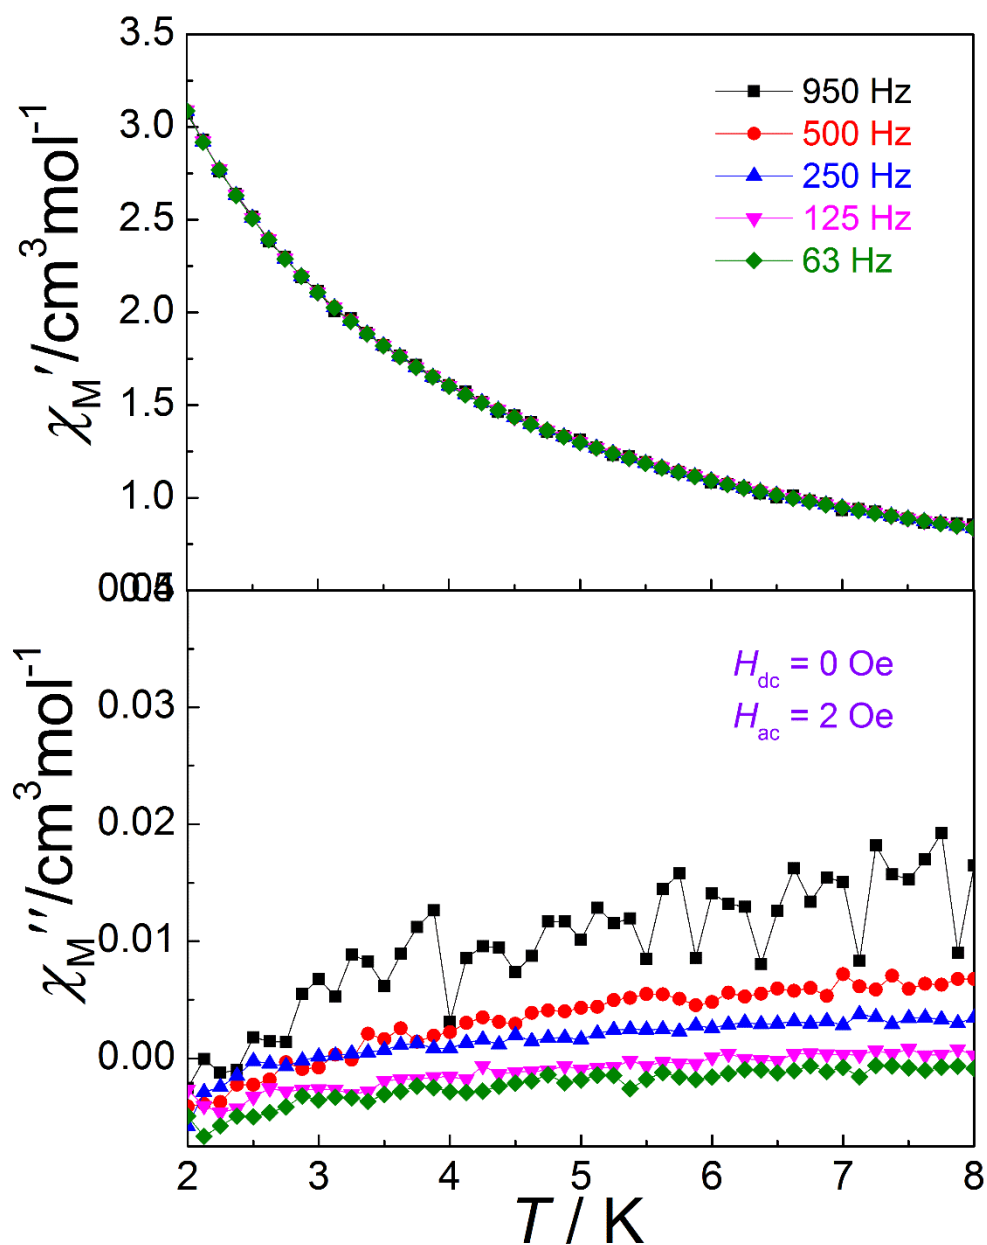

**Fig. S16** Temperature dependent in-phase (top) and out-of-phase (bottom) a.c. susceptibility data

of **3** measured under 0 Oe dc field ( $H_{ac} = 2$  Oe). No out-of-phase signals were observed.

**Table S5** Relaxation fitting parameters from the least-square fitting of the Cole-Cole plots of **3**

according to the generalized Debye model.

| Temperature / K | $\chi_S / \text{cm}^3 \text{mol}^{-1} \text{K}$ | $\chi_T / \text{cm}^3 \text{mol}^{-1} \text{K}$ | $\tau / \text{s}$ | $\alpha$ |
|-----------------|-------------------------------------------------|-------------------------------------------------|-------------------|----------|
| 1.8             | 0.14676                                         | 3.06860                                         | 0.00063           | 0.10517  |
| 2.0             | 0.12290                                         | 2.83739                                         | 0.00051           | 0.10835  |
| 2.2             | 0.12345                                         | 2.69056                                         | 0.00043           | 0.12150  |
| 2.4             | 0.13810                                         | 2.44926                                         | 0.00032           | 0.08777  |
| 2.6             | 0.17507                                         | 2.28701                                         | 0.00025           | 0.06897  |

|     |         |         |         |         |
|-----|---------|---------|---------|---------|
| 2.8 | 0.10657 | 2.15376 | 0.00018 | 0.07319 |
| 3.0 | 0.12491 | 2.01730 | 0.00014 | 0.04976 |
| 3.2 | 0.12390 | 1.90413 | 0.00010 | 0.04022 |
| 3.4 | 0.16281 | 1.80818 | 0.00008 | 0.02634 |
| 3.6 | 0.21249 | 1.72229 | 0.00006 | 0.02662 |
| 3.8 | 0.15275 | 1.64185 | 0.00005 | 0.02547 |

## 5 References

- S1 E. Lewandowska and D. C. Chatfield, *Eur. J. Org. Chem.*, 2005, 3297.
- S2 A. Caneschi, D. Gatteschi, N. Lalioti, C. Sangregorio, R. Sessoli, G. Venturi, A. Vindigni, A. Rettori, M. G. Pini, M. A. Novak, *Angew. Chem., Int. Ed.*, 2001, **40**, 1760.
- S3 SAINT Software Users Guide, version 7.0; Bruker Analytical XRay Systems: Madison, WI, 1999.
- S4 G. M. Sheldrick, SADABS, version 2.03; Bruker Analytical X-RaySystems, Madison, WI, 2000.
- S5 G. M. Sheldrick, SHELXTL, Version 6.14, Bruker AXS, Inc.; Madison, WI 2000-2003.
